# Supplementary material for: Long-term Microglial Phase-specific Dynamics During Single Vessel Occlusion and Recanalization
Source: Research Square preprint supplement (doi:10.21203/rs.3.rs-1112810/v1), 2021-12-08
Supplement: Supplementary file 1 [file 72ba14ec4f74310397f6dc4e.xlsx]

## Sheet: Figure 2 
Figure 2C
	D<60	60<D<100	100<D<150
	494.087	127.81	33.02
	299.117	191.047	20.4573
	569.619	124.296	22.0499
	300.757	84.9904	28.2804
Figure 2D
	Scatter plot	Time (Day)	X				Y				Z					Fitting curve	Time (Day)	X	Y	Z
			mouse 1	mouse 2	mouse 3	mouse 4	mouse 1	mouse 2	mouse 3	mouse 4	mouse 1	mouse 2	mouse 3	mouse 4			0	25.5	7.4591	1.56434
		-0.01	-2.08894	-34.5411	14.8875	2.28251	4.27	-22.3326	21.7252	19.8821	8.17	-12.3639	11.6338	24.2087			0.1	73.0831	18.4232	2.75989
		0	-15.4232	-21.398	22.1987	-0.16342	15.4	-7.38393	32.2024	-3.47598	10.71	-14.4461	19.765	12.5884			0.2	172.71	41.4402	4.92429
		0.01	13.5823	0.0618439	61.6386	43.5767	35.64	12.0792	20.4037	-1.19248	5.84	-3.7837	14.1132	13.2838			0.3	275.241	69.4534	8.23179
		0.02			88.0096				33.0188				14.8933				0.4	346.867	91.7658	12.1521
		0.03	22.277		106.205	54.6589	49.85		38.1622	-6.56873	5.1		15.8597	5.56959			0.5	411.666	110.609	15.4551
		0.04	37.836	28.5342			66.64	44.5652			5.82	14.2384					0.6	472.784	128.699	18.9074
		0.05				62.1457				-5.53795				13.1913			0.7	525.934	145.082	22.3583
		0.06			134.018				43.4248				13.081				0.8	565.841	158.545	25.6571
		0.07	89.0702			79.1015	65.68			-5.17352	0.49			10.4685			0.9	590.313	168.158	28.6556
		0.08			181.498				37.7578				13.7456				1	602.536	174.021	31.2236
		0.09	163.119	125.354		85.9273	72.88	53.4351		-4.77352	2.55	0.236408		8.95786			1.1	601.704	177.152	33.2788
		0.11			269.788				41.3469				14.2564				1.2	592.356	177.902	34.8117
		0.13	193.421			73.828	58.91			-12.021	-8.26			4.61461			1.3	577.059	177.023	35.8831
		0.15		239.842	354.553			79.2516	38.9303			-9.3009	5.77656				1.4	557.216	175.001	36.593
		0.17	209.023				69.26				-3.27						1.5	533.655	172.099	37.0451
		0.18		219.784				44.5874				-21.5498					1.6	506.927	168.464	37.3253
		0.2			358.467				43.2575				7.27997				1.7	477.437	164.185	37.4959
		0.22				111.417				-2.48085				1.77709			1.8	445.509	159.322	37.5986
		0.24	245.802	337.463			137.88	70.6138			19.49	-9.49968					1.9	411.556	153.92	37.6534
		0.27			279.743				35.485				2.37145				2	381.839	148.018	37.6137
		0.33	334.653	504.226			119.27	166.339			13.13	11.4371					2.1	355.675	142.432	37.4926
		0.34				184.885				13.8957				6.7235			2.2	332.514	137.219	37.2987
		0.35			333.728				71.9085				13.1414				2.3	311.91	132.347	37.0381
		0.5	333.008				126.3				-0.7						2.4	293.497	127.787	36.7155
		0.53			441.471				113.909				35.6878				2.5	276.974	123.511	36.3345
		0.54		451.195				211.67				15.5537					2.6	262.088	119.498	35.8978
		0.55				339.227				77.3041				28.1106			2.7	248.629	115.726	35.408
		1	494.087	299.117	569.619	300.757	127.81	191.047	124.296	84.9904	33.02	20.4573	22.0499	28.2804			2.8	236.419	112.175	34.874
		1.1	445.823	339.431	662.787		126.88	156.359	91.1272		25.27	37.5074	19.0715				2.9	225.308	108.83	34.3608
		1.3	444.268	302.617	900.808		159.47	159.563	112.654		36.9	16.2418	29.9843				3	215.166	105.674	33.8672
		1.5	432.977	344.495	1047.22		193.08	174.951	103.818		45.68	18.2455	36.8415				3.1	205.884	102.693	33.3922
		2	276.849	192.721	847.249		182.22	140.143	124.18		31.64	19.2825	40.5577				3.2	197.367	99.8752	32.935
		2.1	332.185	178.313	800.454		199.21	135.498	131.934		35.74	27.6331	37.2456				3.3	189.532	97.2079	32.4946
		2.3	299.751	125.115	712.903		161.93	116.692	153.343		29.41	21.9894	48.2115				3.4	182.309	94.681	32.0703
		2.5	262.65	84.9549	517.596		126.23	105.2	131.844		28.98	25.1754	42.8199				3.5	175.634	92.2846	31.6613
		3	187.159	68.4649	608.914		138.16	86.0803	191.731		32.52	28.879	51.8578				3.6	169.454	90.0101	31.2667
		3.5	157.225	55.5679	578.569		115.88	67.496	141.483		43.42	18.5516	47.9241				3.7	163.721	87.8491	30.8861
		4	190.468	54.6056	341.214		109.8	62.6404	131.353		41.7	16.8187	36.4677				3.8	158.392	85.7944	30.5186
		4.5	155.249	27.0087	355.101		100.28	32.0319	150.405		32.25	7.64599	47.2689				3.9	153.43	83.8389	30.1638
		5	166.411	35.9455	248.914	88.1029	84.89	28.9967	126.93	59.944	30.86	4.85492	36.3151	30.2638			4	148.803	81.9764	29.821
		5.5	126.239	40.8567	236.874		73.28	31.2676	120.027		21.06	5.49186	47.8419				4.1	144.48	80.2012	29.4898
		6	144.551	37.7625	250.199		74.59	31.7794	126.982		29.55	0.152684	43.7768				4.2	140.436	78.5077	29.1695
		6.5	154.13	41.3255	195.624		63.2	38.7243	98.5375		19.12	10.0384	38.0476				4.3	136.646	76.8911	28.8597
		7	159.698	30.2575	210.673	123.379	62.94	24.5504	99.4983	46.5705	25.38	-3.11331	32.4777	27.6767			4.4	133.091	75.3468	28.56
		8	120.954	22.489	193.395		55.39	16.1023	92.9834		15.93	4.02819	29.078				4.5	129.751	73.8705	28.2699
		9	109.255	8.69009	172.592	64.1579	45.13	5.4581	80.6283	19.4904	15.63	-2.90547	27.0262	14.7375			4.6	126.608	72.4583	27.989
		10	148.915	3.72345	179.393	84.773	44.52	7.04502	67.9673	28.4792	19.7	-4.74934	22.7506	28.7508			4.7	123.648	71.1065	27.717
		11	131.332	-1.38698	164.904		39.35	5.32595	69.6679		14.82	-2.57101	21.5086				4.8	120.857	69.8118	27.4534
		12	137.676	15.9998	154.014	71.7067	39.99	-0.99825	63.6078	23.0029	25.29	-0.69734	28.1827	26.4143			4.9	118.222	68.5709	27.1979
		13			170.952				78.6616				28.1528				5	115.731	67.3809	26.9502
		14	111.831				52.02				24.76						5.1	113.375	66.239	26.71
		15			117.587				61.807				27.3666				5.2	111.143	65.1427	26.477
		16	91.2846				46.02				19.25						5.3	109.028	64.0896	26.2509
		17	124.616		110.899	29.5624	55.95		49.0162	-0.15914	26.35		16.4532	20.1696			5.4	107.02	63.0775	26.0313
		19	134.604				48.39				28.3						5.5	105.114	62.1042	25.8182
		20			134.788				46.77				24.2861				5.6	103.302	61.1678	25.6112
		21				30.2901				3.31536				28.8852			5.7	101.577	60.2665	25.41
		24	100.944				27.82				12.64						5.8	99.9357	59.3984	25.2146
		25			113.523	33.965			40.5843	-3.40695			22.512	21.2105			5.9	98.3712	58.562	25.0245
		28	64.1055				32.05				21.87						6	96.8792	57.7559	24.8398
		29			124.836	44.4454			49.9539	2.90592			12.394	9.50843			6.1	95.4554	56.9784	24.6601
		32	55.4872				29.29				24.18						6.2	94.0955	56.2283	24.4853
		33			75.5231	18.5582			38.6882	7.55485			12.6146	17.5678			6.3	92.7958	55.5043	24.3152
		36	59.18				32.35				26.84						6.4	91.5528	54.8053	24.1496
		37			66.9661	31.5258			25.3271	18.5203			18.4637	22.6453			6.5	90.3633	54.13	23.9884
		40	54.9546				34.13				23.05						6.6	89.2242	53.4774	23.8315
		41			107.693	18.7304			36.5681	6.3613			21.2646	21.2114			6.7	88.1327	52.8465	23.6786
		44	80.4348				30.73				18.26						6.8	87.0862	52.2364	23.5296
		45			74.0445	21.9498			17.0411	2.92953			12.0085	12.5358			6.9	86.0822	51.6461	23.3845
		48	89.5572				46.03				25.4						7	85.1185	51.0749	23.243
		49			73.1403	47.5864			32.6754	18.7811			25.0305	21.3962			7.1	84.193	50.5218	23.1051
		52	53.6489				41.4				15.83						7.2	83.3036	49.9861	22.9706
		53			57.3557	17.4269			30.2242	9.03298			15.5444	15.6885			7.3	82.4485	49.4672	22.8394
		56	65.2416				33.89				20.27						7.4	81.6259	48.9642	22.7115
		57			43.4097	0.624799			20.1522	3.09167			17.147	7.67114			7.5	80.8343	48.4766	22.5866
		59				9.64832				14.5617				19.9102			7.6	80.0721	48.0038	22.4648
		60	57.75				29.47				16.51						7.7	79.3378	47.5451	22.3459
		61			51.7165				25.0761				12.9233				7.8	78.6301	47.1	22.2298
		64	78.1629				45.13				18.2						7.9	77.9477	46.6679	22.1164
		65			32.7606				15.7324				12.2529				8	77.2894	46.2485	22.0057
		66	65.6734			10.177	31.84			-1.04051	15.4			17.3834			8.1	76.6542	45.8411	21.8975
		69			25.4191				10.7532				5.26526				8.2	76.0409	45.4453	21.7919
		73	73.5183		28.0011		16.6		15.7047		15.11		14.5763				8.3	75.4485	45.0606	21.6886
																	8.4	74.8762	44.6868	21.5877
																	8.5	74.3229	44.3233	21.489
																	8.6	73.788	43.9697	21.3926
																	8.7	73.2705	43.6258	21.2982
																	8.8	72.7697	43.2912	21.206
																	8.9	72.2849	42.9655	21.1158
																	9	71.8154	42.6484	21.0275
																	9.1	71.3607	42.3397	20.9411
																	9.2	70.92	42.039	20.8566
																	9.3	70.4928	41.7461	20.7738
																	9.4	70.0786	41.4606	20.6928
																	9.5	69.6768	41.1824	20.6135
																	9.6	69.287	40.9112	20.5359
																	9.7	68.9087	40.6467	20.4598
																	9.8	68.5414	40.3888	20.3853
																	9.9	68.1847	40.1372	20.3123
																	10	67.8382	39.8918	20.2408
																	10.1	67.5015	39.6523	20.1707
																	10.2	67.1742	39.4185	20.102
																	10.3	66.8561	39.1902	20.0347
																	10.4	66.5467	38.9673	19.9687
																	10.5	66.2458	38.7497	19.904
																	10.6	65.953	38.5371	19.8405
																	10.7	65.668	38.3294	19.7783
																	10.8	65.3907	38.1264	19.7173
																	10.9	65.1206	37.9281	19.6574
																	11	64.8576	37.7342	19.5987
																	11.1	64.6014	37.5446	19.541
																	11.2	64.3517	37.3592	19.4845
																	11.3	64.1084	37.178	19.429
																	11.4	63.8713	37.0006	19.3745
																	11.5	63.6401	36.8272	19.321
																	11.6	63.4146	36.6574	19.2685
																	11.7	63.1946	36.4913	19.2169
																	11.8	62.9801	36.3287	19.1663
																	11.9	62.7707	36.1696	19.1166
																	12	62.5664	36.0138	19.0677
																	12.1	62.3669	35.8612	19.0198
																	12.2	62.1721	35.7117	18.9726
																	12.3	61.9819	35.5654	18.9263
																	12.4	61.7961	35.422	18.8808
																	12.5	61.6147	35.2815	18.8361
																	12.6	61.4373	35.1438	18.7922
																	12.7	61.264	35.0089	18.749
																	12.8	61.0947	34.8767	18.7065
																	12.9	60.9291	34.747	18.6648
																	13	60.7672	34.6199	18.6237
																	13.1	60.6088	34.4953	18.5834
																	13.2	60.454	34.373	18.5437
																	13.3	60.3025	34.2532	18.5047
																	13.4	60.1542	34.1356	18.4663
																	13.5	60.0092	34.0202	18.4285
																	13.6	59.8672	33.907	18.3914
																	13.7	59.7282	33.7959	18.3548
																	13.8	59.5922	33.6869	18.3189
																	13.9	59.459	33.5799	18.2835
																	14	59.3285	33.4749	18.2487
																	14.1	59.2008	33.3718	18.2144
																	14.2	59.0756	33.2705	18.1807
																	14.3	58.953	33.1711	18.1475
																	14.4	58.8328	33.0735	18.1148
																	14.5	58.715	32.9776	18.0826
																	14.6	58.5996	32.8834	18.0509
																	14.7	58.4865	32.7909	18.0197
																	14.8	58.3756	32.6999	17.989
																	14.9	58.2668	32.6106	17.9587
																	15	58.1601	32.5228	17.9289
																	15.1	58.0555	32.4365	17.8996
																	15.2	57.9529	32.3517	17.8707
																	15.3	57.8523	32.2684	17.8422
																	15.4	57.7535	32.1864	17.8142
																	15.5	57.6566	32.1059	17.7865
																	15.6	57.5615	32.0266	17.7593
																	15.7	57.4682	31.9487	17.7324
																	15.8	57.3766	31.8721	17.706
																	15.9	57.2866	31.7968	17.6799
																	16	57.1983	31.7226	17.6542
																	16.1	57.1116	31.6497	17.6289
																	16.2	57.0265	31.578	17.6039
																	16.3	56.9428	31.5074	17.5793
																	16.4	56.8607	31.438	17.5551
																	16.5	56.78	31.3696	17.5311
																	16.6	56.7007	31.3023	17.5075
																	16.7	56.6228	31.2361	17.4843
																	16.8	56.5463	31.171	17.4613
																	16.9	56.471	31.1068	17.4387
																	17	56.3971	31.0437	17.4164
																	17.1	56.3244	30.9815	17.3944
																	17.2	56.253	30.9203	17.3727
																	17.3	56.1827	30.86	17.3513
																	17.4	56.1137	30.8006	17.3302
																	17.5	56.0457	30.7421	17.3093
																	17.6	55.9789	30.6845	17.2888
																	17.7	55.9133	30.6278	17.2685
																	17.8	55.8487	30.5719	17.2484
																	17.9	55.7851	30.5169	17.2287
																	18	55.7226	30.4626	17.2092
																	18.1	55.661	30.4092	17.1899
																	18.2	55.6005	30.3565	17.171
																	18.3	55.5409	30.3046	17.1522
																	18.4	55.4823	30.2534	17.1337
																	18.5	55.4246	30.203	17.1154
																	18.6	55.3678	30.1533	17.0974
																	18.7	55.3119	30.1044	17.0796
																	18.8	55.2569	30.0561	17.062
																	18.9	55.2027	30.0085	17.0447
																	19	55.1494	29.9615	17.0275
																	19.1	55.0969	29.9152	17.0106
																	19.2	55.0451	29.8696	16.9939
																	19.3	54.9942	29.8246	16.9774
																	19.4	54.944	29.7802	16.9611
																	19.5	54.8946	29.7364	16.945
																	19.6	54.8459	29.6933	16.9291
																	19.7	54.7979	29.6507	16.9134
																	19.8	54.7506	29.6087	16.8979
																	19.9	54.7041	29.5672	16.8825
																	20	54.6582	29.5263	16.8674
																	20.1	54.613	29.486	16.8524
																	20.2	54.5684	29.4462	16.8376
																	20.3	54.5245	29.4069	16.823
																	20.4	54.4812	29.3682	16.8086
																	20.5	54.4386	29.3299	16.7943
																	20.6	54.3965	29.2922	16.7803
																	20.7	54.355	29.2549	16.7663
																	20.8	54.3142	29.2181	16.7526
																	20.9	54.2738	29.1818	16.739
																	21	54.2341	29.146	16.7255
																	21.1	54.1949	29.1106	16.7122
																	21.2	54.1563	29.0757	16.6991
																	21.3	54.1181	29.0412	16.6861
																	21.4	54.0805	29.0072	16.6732
																	21.5	54.0435	28.9736	16.6605
																	21.6	54.0069	28.9404	16.648
																	21.7	53.9708	28.9076	16.6356
																	21.8	53.9352	28.8752	16.6233
																	21.9	53.9001	28.8433	16.6112
																	22	53.8654	28.8117	16.5992
																	22.1	53.8312	28.7805	16.5873
																	22.2	53.7975	28.7497	16.5756
																	22.3	53.7642	28.7193	16.564
																	22.4	53.7313	28.6892	16.5525
																	22.5	53.6988	28.6595	16.5412
																	22.6	53.6668	28.6301	16.53
																	22.7	53.6352	28.6012	16.5189
																	22.8	53.604	28.5725	16.5079
																	22.9	53.5732	28.5442	16.497
																	23	53.5428	28.5162	16.4863
																	23.1	53.5128	28.4886	16.4756
																	23.2	53.4832	28.4613	16.4651
																	23.3	53.4539	28.4343	16.4547
																	23.4	53.425	28.4076	16.4444
																	23.5	53.3965	28.3812	16.4342
																	23.6	53.3683	28.3552	16.4242
																	23.7	53.3405	28.3294	16.4142
																	23.8	53.313	28.3039	16.4043
																	23.9	53.2859	28.2787	16.3946
																	24	53.259	28.2538	16.3849
																	24.1	53.2325	28.2292	16.3753
																	24.2	53.2064	28.2049	16.3659
																	24.3	53.1805	28.1808	16.3565
																	24.4	53.155	28.1571	16.3472
																	24.5	53.1298	28.1335	16.338
																	24.6	53.1048	28.1103	16.329
																	24.7	53.0802	28.0873	16.32
																	24.8	53.0559	28.0645	16.3111
																	24.9	53.0318	28.042	16.3023
																	25	53.008	28.0198	16.2935
																	25.1	52.9845	27.9978	16.2849
																	25.2	52.9613	27.976	16.2764
																	25.3	52.9384	27.9545	16.2679
																	25.4	52.9157	27.9332	16.2595
																	25.5	52.8933	27.9121	16.2512
																	25.6	52.8711	27.8913	16.243
																	25.7	52.8492	27.8706	16.2349
																	25.8	52.8275	27.8502	16.2268
																	25.9	52.8061	27.83	16.2188
																	26	52.7849	27.8101	16.2109
																	26.1	52.764	27.7903	16.2031
																	26.2	52.7433	27.7708	16.1954
																	26.3	52.7228	27.7514	16.1877
																	26.4	52.7026	27.7323	16.1801
																	26.5	52.6826	27.7133	16.1726
																	26.6	52.6628	27.6946	16.1651
																	26.7	52.6432	27.676	16.1577
																	26.8	52.6239	27.6577	16.1504
																	26.9	52.6047	27.6395	16.1432
																	27	52.5858	27.6215	16.136
																	27.1	52.567	27.6037	16.1289
																	27.2	52.5485	27.5861	16.1219
																	27.3	52.5302	27.5686	16.1149
																	27.4	52.5121	27.5513	16.108
																	27.5	52.4941	27.5342	16.1011
																	27.6	52.4764	27.5173	16.0943
																	27.7	52.4588	27.5006	16.0876
																	27.8	52.4414	27.484	16.081
																	27.9	52.4242	27.4675	16.0744
																	28	52.4072	27.4513	16.0678
																	28.1	52.3904	27.4352	16.0613
																	28.2	52.3738	27.4192	16.0549
																	28.3	52.3573	27.4034	16.0486
																	28.4	52.341	27.3878	16.0423
																	28.5	52.3248	27.3723	16.036
																	28.6	52.3089	27.357	16.0298
																	28.7	52.293	27.3418	16.0237
																	28.8	52.2774	27.3268	16.0176
																	28.9	52.2619	27.3119	16.0116
																	29	52.2466	27.2971	16.0056
																	29.1	52.2314	27.2825	15.9997
																	29.2	52.2164	27.268	15.9938
																	29.3	52.2015	27.2537	15.988
																	29.4	52.1868	27.2395	15.9822
																	29.5	52.1722	27.2254	15.9765
																	29.6	52.1578	27.2115	15.9708
																	29.7	52.1435	27.1977	15.9652
																	29.8	52.1294	27.184	15.9597
																	29.9	52.1154	27.1705	15.9541
																	30	52.1015	27.1571	15.9487
																	30.1	52.0878	27.1438	15.9432
																	30.2	52.0742	27.1306	15.9379
																	30.3	52.0607	27.1175	15.9325
																	30.4	52.0474	27.1046	15.9272
																	30.5	52.0342	27.0918	15.922
																	30.6	52.0211	27.0791	15.9168
																	30.7	52.0081	27.0665	15.9116
																	30.8	51.9953	27.054	15.9065
																	30.9	51.9826	27.0417	15.9015
																	31	51.97	27.0294	15.8964
																	31.1	51.9575	27.0173	15.8914
																	31.2	51.9452	27.0053	15.8865
																	31.3	51.933	26.9933	15.8816
																	31.4	51.9208	26.9815	15.8767
																	31.5	51.9088	26.9698	15.8719
																	31.6	51.897	26.9582	15.8671
																	31.7	51.8852	26.9467	15.8624
																	31.8	51.8735	26.9353	15.8577
																	31.9	51.8619	26.924	15.853
																	32	51.8505	26.9128	15.8484
																	32.1	51.8391	26.9017	15.8438
																	32.2	51.8279	26.8907	15.8392
																	32.3	51.8168	26.8798	15.8347
																	32.4	51.8057	26.8689	15.8302
																	32.5	51.7948	26.8582	15.8258
																	32.6	51.7839	26.8476	15.8214
																	32.7	51.7732	26.837	15.817
																	32.8	51.7625	26.8266	15.8127
																	32.9	51.752	26.8162	15.8084
																	33	51.7415	26.8059	15.8041
																	33.1	51.7312	26.7957	15.7999
																	33.2	51.7209	26.7856	15.7957
																	33.3	51.7107	26.7756	15.7915
																	33.4	51.7006	26.7657	15.7874
																	33.5	51.6906	26.7558	15.7833
																	33.6	51.6807	26.7461	15.7792
																	33.7	51.6709	26.7364	15.7751
																	33.8	51.6611	26.7268	15.7711
																	33.9	51.6515	26.7172	15.7672
																	34	51.6419	26.7078	15.7632
																	34.1	51.6324	26.6984	15.7593
																	34.2	51.623	26.6891	15.7554
																	34.3	51.6137	26.6799	15.7515
																	34.4	51.6045	26.6708	15.7477
																	34.5	51.5953	26.6617	15.7439
																	34.6	51.5862	26.6527	15.7402
																	34.7	51.5772	26.6438	15.7364
																	34.8	51.5683	26.6349	15.7327
																	34.9	51.5594	26.6261	15.729
																	35	51.5506	26.6174	15.7254
																	35.1	51.5419	26.6088	15.7217
																	35.2	51.5333	26.6002	15.7181
																	35.3	51.5247	26.5917	15.7145
																	35.4	51.5162	26.5833	15.711
																	35.5	51.5078	26.5749	15.7075
																	35.6	51.4994	26.5666	15.704
																	35.7	51.4912	26.5584	15.7005
																	35.8	51.4829	26.5502	15.6971
																	35.9	51.4748	26.5421	15.6936
																	36	51.4667	26.5341	15.6902
																	36.1	51.4587	26.5261	15.6869
																	36.2	51.4508	26.5182	15.6835
																	36.3	51.4429	26.5103	15.6802
																	36.4	51.4351	26.5025	15.6769
																	36.5	51.4273	26.4948	15.6736
																	36.6	51.4196	26.4871	15.6704
																	36.7	51.412	26.4795	15.6672
																	36.8	51.4044	26.4719	15.664
																	36.9	51.3969	26.4644	15.6608
																	37	51.3895	26.457	15.6576
																	37.1	51.3821	26.4496	15.6545
																	37.2	51.3747	26.4423	15.6514
																	37.3	51.3675	26.435	15.6483
																	37.4	51.3603	26.4278	15.6452
																	37.5	51.3531	26.4206	15.6422
																	37.6	51.346	26.4135	15.6392
																	37.7	51.3389	26.4064	15.6361
																	37.8	51.332	26.3994	15.6332
																	37.9	51.325	26.3925	15.6302
																	38	51.3181	26.3856	15.6273
																	38.1	51.3113	26.3787	15.6243
																	38.2	51.3045	26.3719	15.6214
																	38.3	51.2978	26.3652	15.6186
																	38.4	51.2911	26.3585	15.6157
																	38.5	51.2845	26.3518	15.6129
																	38.6	51.278	26.3452	15.61
																	38.7	51.2714	26.3386	15.6072
																	38.8	51.265	26.3321	15.6045
																	38.9	51.2585	26.3257	15.6017
																	39	51.2522	26.3193	15.599
																	39.1	51.2459	26.3129	15.5962
																	39.2	51.2396	26.3066	15.5935
																	39.3	51.2334	26.3003	15.5908
																	39.4	51.2272	26.2941	15.5882
																	39.5	51.221	26.2879	15.5855
																	39.6	51.215	26.2818	15.5829
																	39.7	51.2089	26.2757	15.5803
																	39.8	51.2029	26.2696	15.5777
																	39.9	51.197	26.2636	15.5751
																	40	51.191	26.2576	15.5725
																	40.1	51.1852	26.2517	15.57
																	40.2	51.1794	26.2458	15.5675
																	40.3	51.1736	26.24	15.5649
																	40.4	51.1678	26.2342	15.5624
																	40.5	51.1621	26.2284	15.56
																	40.6	51.1565	26.2227	15.5575
																	40.7	51.1509	26.217	15.5551
																	40.8	51.1453	26.2114	15.5526
																	40.9	51.1398	26.2058	15.5502
																	41	51.1343	26.2002	15.5478
																	41.1	51.1288	26.1947	15.5454
																	41.2	51.1234	26.1892	15.5431
																	41.3	51.118	26.1837	15.5407
																	41.4	51.1127	26.1783	15.5384
																	41.5	51.1074	26.173	15.536
																	41.6	51.1022	26.1676	15.5337
																	41.7	51.0969	26.1623	15.5314
																	41.8	51.0917	26.157	15.5292
																	41.9	51.0866	26.1518	15.5269
																	42	51.0815	26.1466	15.5247
																	42.1	51.0764	26.1415	15.5224
																	42.2	51.0714	26.1363	15.5202
																	42.3	51.0664	26.1312	15.518
																	42.4	51.0614	26.1262	15.5158
																	42.5	51.0565	26.1212	15.5136
																	42.6	51.0516	26.1162	15.5115
																	42.7	51.0467	26.1112	15.5093
																	42.8	51.0419	26.1063	15.5072
																	42.9	51.0371	26.1014	15.5051
																	43	51.0323	26.0966	15.5029
																	43.1	51.0276	26.0917	15.5008
																	43.2	51.0229	26.0869	15.4988
																	43.3	51.0182	26.0822	15.4967
																	43.4	51.0135	26.0774	15.4946
																	43.5	51.0089	26.0727	15.4926
																	43.6	51.0044	26.0681	15.4906
																	43.7	50.9998	26.0634	15.4885
																	43.8	50.9953	26.0588	15.4865
																	43.9	50.9908	26.0542	15.4845
																	44	50.9864	26.0497	15.4825
																	44.1	50.982	26.0452	15.4806
																	44.2	50.9776	26.0407	15.4786
																	44.3	50.9732	26.0362	15.4767
																	44.4	50.9689	26.0318	15.4747
																	44.5	50.9646	26.0274	15.4728
																	44.6	50.9603	26.023	15.4709
																	44.7	50.956	26.0187	15.469
																	44.8	50.9518	26.0143	15.4671
																	44.9	50.9476	26.01	15.4652
																	45	50.9435	26.0058	15.4634
																	45.1	50.9393	26.0015	15.4615
																	45.2	50.9352	25.9973	15.4597
																	45.3	50.9311	25.9931	15.4578
																	45.4	50.9271	25.989	15.456
																	45.5	50.923	25.9848	15.4542
																	45.6	50.919	25.9807	15.4524
																	45.7	50.9151	25.9766	15.4506
																	45.8	50.9111	25.9726	15.4488
																	45.9	50.9072	25.9686	15.4471
																	46	50.9033	25.9646	15.4453
																	46.1	50.8994	25.9606	15.4436
																	46.2	50.8956	25.9566	15.4418
																	46.3	50.8917	25.9527	15.4401
																	46.4	50.8879	25.9488	15.4384
																	46.5	50.8841	25.9449	15.4367
																	46.6	50.8804	25.941	15.435
																	46.7	50.8767	25.9372	15.4333
																	46.8	50.873	25.9334	15.4316
																	46.9	50.8693	25.9296	15.4299
																	47	50.8656	25.9258	15.4283
																	47.1	50.862	25.9221	15.4266
																	47.2	50.8584	25.9183	15.425
																	47.3	50.8548	25.9146	15.4234
																	47.4	50.8512	25.911	15.4218
																	47.5	50.8477	25.9073	15.4201
																	47.6	50.8441	25.9037	15.4185
																	47.7	50.8406	25.9001	15.4169
																	47.8	50.8372	25.8965	15.4154
																	47.9	50.8337	25.8929	15.4138
																	48	50.8303	25.8894	15.4122
																	48.1	50.8268	25.8858	15.4107
																	48.2	50.8235	25.8823	15.4091
																	48.3	50.8201	25.8789	15.4076
																	48.4	50.8167	25.8754	15.406
																	48.5	50.8134	25.8719	15.4045
																	48.6	50.8101	25.8685	15.403
																	48.7	50.8068	25.8651	15.4015
																	48.8	50.8035	25.8617	15.4
																	48.9	50.8003	25.8584	15.3985
																	49	50.797	25.855	15.397
																	49.1	50.7938	25.8517	15.3956
																	49.2	50.7906	25.8484	15.3941
																	49.3	50.7874	25.8451	15.3927
																	49.4	50.7843	25.8418	15.3912
																	49.5	50.7812	25.8386	15.3898
																	49.6	50.778	25.8354	15.3883
																	49.7	50.7749	25.8322	15.3869
																	49.8	50.7719	25.829	15.3855
																	49.9	50.7688	25.8258	15.3841
																	50	50.7658	25.8226	15.3827
																	50.1	50.7627	25.8195	15.3813
																	50.2	50.7597	25.8164	15.3799
																	50.3	50.7567	25.8133	15.3785
																	50.4	50.7538	25.8102	15.3772
																	50.5	50.7508	25.8071	15.3758
																	50.6	50.7479	25.8041	15.3744
																	50.7	50.7449	25.8011	15.3731
																	50.8	50.742	25.798	15.3718
																	50.9	50.7392	25.795	15.3704
																	51	50.7363	25.7921	15.3691
																	51.1	50.7334	25.7891	15.3678
																	51.2	50.7306	25.7861	15.3665
																	51.3	50.7278	25.7832	15.3652
																	51.4	50.725	25.7803	15.3639
																	51.5	50.7222	25.7774	15.3626
																	51.6	50.7194	25.7745	15.3613
																	51.7	50.7167	25.7717	15.36
																	51.8	50.7139	25.7688	15.3587
																	51.9	50.7112	25.766	15.3575
																	52	50.7085	25.7632	15.3562
																	52.1	50.7058	25.7604	15.355
																	52.2	50.7031	25.7576	15.3537
																	52.3	50.7004	25.7548	15.3525
																	52.4	50.6978	25.752	15.3513
																	52.5	50.6952	25.7493	15.35
																	52.6	50.6925	25.7466	15.3488
																	52.7	50.6899	25.7439	15.3476
																	52.8	50.6874	25.7412	15.3464
																	52.9	50.6848	25.7385	15.3452
																	53	50.6822	25.7358	15.344
																	53.1	50.6797	25.7331	15.3428
																	53.2	50.6771	25.7305	15.3416
																	53.3	50.6746	25.7279	15.3405
																	53.4	50.6721	25.7253	15.3393
																	53.5	50.6696	25.7227	15.3381
																	53.6	50.6672	25.7201	15.337
																	53.7	50.6647	25.7175	15.3358
																	53.8	50.6623	25.715	15.3347
																	53.9	50.6598	25.7124	15.3335
																	54	50.6574	25.7099	15.3324
																	54.1	50.655	25.7074	15.3313
																	54.2	50.6526	25.7049	15.3302
																	54.3	50.6502	25.7024	15.329
																	54.4	50.6478	25.6999	15.3279
																	54.5	50.6455	25.6974	15.3268
																	54.6	50.6431	25.695	15.3257
																	54.7	50.6408	25.6926	15.3246
																	54.8	50.6385	25.6901	15.3235
																	54.9	50.6362	25.6877	15.3225
																	55	50.6339	25.6853	15.3214
																	55.1	50.6316	25.6829	15.3203
																	55.2	50.6294	25.6806	15.3192
																	55.3	50.6271	25.6782	15.3182
																	55.4	50.6249	25.6759	15.3171
																	55.5	50.6226	25.6735	15.3161
																	55.6	50.6204	25.6712	15.315
																	55.7	50.6182	25.6689	15.314
																	55.8	50.616	25.6666	15.313
																	55.9	50.6138	25.6643	15.3119
																	56	50.6117	25.662	15.3109
																	56.1	50.6095	25.6598	15.3099
																	56.2	50.6073	25.6575	15.3089
																	56.3	50.6052	25.6553	15.3079
																	56.4	50.6031	25.653	15.3069
																	56.5	50.601	25.6508	15.3059
																	56.6	50.5989	25.6486	15.3049
																	56.7	50.5968	25.6464	15.3039
																	56.8	50.5947	25.6442	15.3029
																	56.9	50.5926	25.642	15.3019
																	57	50.5905	25.6399	15.3009
																	57.1	50.5885	25.6377	15.3
																	57.2	50.5865	25.6356	15.299
																	57.3	50.5844	25.6335	15.298
																	57.4	50.5824	25.6313	15.2971
																	57.5	50.5804	25.6292	15.2961
																	57.6	50.5784	25.6271	15.2952
																	57.7	50.5764	25.625	15.2942
																	57.8	50.5744	25.623	15.2933
																	57.9	50.5725	25.6209	15.2924
																	58	50.5705	25.6188	15.2914
																	58.1	50.5686	25.6168	15.2905
																	58.2	50.5666	25.6147	15.2896
																	58.3	50.5647	25.6127	15.2887
																	58.4	50.5628	25.6107	15.2877
																	58.5	50.5609	25.6087	15.2868
																	58.6	50.559	25.6067	15.2859
																	58.7	50.5571	25.6047	15.285
																	58.8	50.5552	25.6027	15.2841
																	58.9	50.5533	25.6008	15.2832
																	59	50.5515	25.5988	15.2824
																	59.1	50.5496	25.5969	15.2815
																	59.2	50.5478	25.5949	15.2806
																	59.3	50.546	25.593	15.2797
																	59.4	50.5441	25.5911	15.2789
																	59.5	50.5423	25.5892	15.278
																	59.6	50.5405	25.5873	15.2771
																	59.7	50.5387	25.5854	15.2763
																	59.8	50.5369	25.5835	15.2754
																	59.9	50.5352	25.5816	15.2746
																	60	50.5334	25.5797	15.2737
																	60.1	50.5316	25.5779	15.2729
																	60.2	50.5299	25.576	15.272
																	60.3	50.5281	25.5742	15.2712
																	60.4	50.5264	25.5724	15.2704
																	60.5	50.5247	25.5705	15.2695
																	60.6	50.523	25.5687	15.2687
																	60.7	50.5213	25.5669	15.2679
																	60.8	50.5196	25.5651	15.2671
																	60.9	50.5179	25.5633	15.2663
																	61	50.5162	25.5616	15.2655
																	61.1	50.5145	25.5598	15.2647
																	61.2	50.5128	25.558	15.2639
																	61.3	50.5112	25.5563	15.2631
																	61.4	50.5095	25.5545	15.2623
																	61.5	50.5079	25.5528	15.2615
																	61.6	50.5062	25.5511	15.2607
																	61.7	50.5046	25.5493	15.2599
																	61.8	50.503	25.5476	15.2591
																	61.9	50.5014	25.5459	15.2583
																	62	50.4998	25.5442	15.2576
																	62.1	50.4982	25.5425	15.2568
																	62.2	50.4966	25.5409	15.256
																	62.3	50.495	25.5392	15.2553
																	62.4	50.4934	25.5375	15.2545
																	62.5	50.4919	25.5359	15.2538
																	62.6	50.4903	25.5342	15.253
																	62.7	50.4888	25.5326	15.2523
																	62.8	50.4872	25.5309	15.2515
																	62.9	50.4857	25.5293	15.2508
																	63	50.4842	25.5277	15.25
																	63.1	50.4826	25.5261	15.2493
																	63.2	50.4811	25.5245	15.2486
																	63.3	50.4796	25.5229	15.2478
																	63.4	50.4781	25.5213	15.2471
																	63.5	50.4766	25.5197	15.2464
																	63.6	50.4751	25.5181	15.2457
																	63.7	50.4737	25.5166	15.245
																	63.8	50.4722	25.515	15.2442
																	63.9	50.4707	25.5134	15.2435
																	64	50.4693	25.5119	15.2428
																	64.1	50.4678	25.5103	15.2421
																	64.2	50.4664	25.5088	15.2414
																	64.3	50.4649	25.5073	15.2407
																	64.4	50.4635	25.5058	15.24
																	64.5	50.4621	25.5043	15.2393
																	64.6	50.4606	25.5027	15.2386
																	64.7	50.4592	25.5012	15.238
																	64.8	50.4578	25.4998	15.2373
																	64.9	50.4564	25.4983	15.2366
																	65	50.455	25.4968	15.2359
																	65.1	50.4536	25.4953	15.2352
																	65.2	50.4523	25.4938	15.2346
																	65.3	50.4509	25.4924	15.2339
																	65.4	50.4495	25.4909	15.2332
																	65.5	50.4482	25.4895	15.2326
																	65.6	50.4468	25.488	15.2319
																	65.7	50.4454	25.4866	15.2313
																	65.8	50.4441	25.4852	15.2306
																	65.9	50.4428	25.4838	15.2299
																	66	50.4414	25.4823	15.2293
																	66.1	50.4401	25.4809	15.2287
																	66.2	50.4388	25.4795	15.228
																	66.3	50.4375	25.4781	15.2274
																	66.4	50.4362	25.4767	15.2267
																	66.5	50.4349	25.4754	15.2261
																	66.6	50.4336	25.474	15.2255
																	66.7	50.4323	25.4726	15.2248
																	66.8	50.431	25.4712	15.2242
																	66.9	50.4297	25.4699	15.2236
																	67	50.4284	25.4685	15.223
																	67.1	50.4272	25.4672	15.2223
																	67.2	50.4259	25.4658	15.2217
																	67.3	50.4247	25.4645	15.2211
																	67.4	50.4234	25.4632	15.2205
																	67.5	50.4222	25.4618	15.2199
																	67.6	50.4209	25.4605	15.2193
																	67.7	50.4197	25.4592	15.2187
																	67.8	50.4185	25.4579	15.2181
																	67.9	50.4172	25.4566	15.2175
																	68	50.416	25.4553	15.2169
																	68.1	50.4148	25.454	15.2163
																	68.2	50.4136	25.4527	15.2157
																	68.3	50.4124	25.4514	15.2151
																	68.4	50.4112	25.4502	15.2145
																	68.5	50.41	25.4489	15.2139
																	68.6	50.4088	25.4476	15.2133
																	68.7	50.4076	25.4464	15.2128
																	68.8	50.4065	25.4451	15.2122
																	68.9	50.4053	25.4439	15.2116
																	69	50.4041	25.4426	15.211
																	69.1	50.403	25.4414	15.2105
																	69.2	50.4018	25.4401	15.2099
																	69.3	50.4007	25.4389	15.2093
																	69.4	50.3995	25.4377	15.2088
																	69.5	50.3984	25.4365	15.2082
																	69.6	50.3972	25.4353	15.2077
																	69.7	50.3961	25.434	15.2071
																	69.8	50.395	25.4328	15.2065
																	69.9	50.3939	25.4316	15.206
																	70	50.3927	25.4304	15.2054
																	70.1	50.3916	25.4293	15.2049
																	70.2	50.3905	25.4281	15.2043
																	70.3	50.3894	25.4269	15.2038
																	70.4	50.3883	25.4257	15.2033
																	70.5	50.3872	25.4246	15.2027
																	70.6	50.3861	25.4234	15.2022
																	70.7	50.3851	25.4222	15.2016
																	70.8	50.384	25.4211	15.2011
																	70.9	50.3829	25.4199	15.2006
																	71	50.3818	25.4188	15.2001
																	71.1	50.3808	25.4176	15.1995
																	71.2	50.3797	25.4165	15.199
																	71.3	50.3786	25.4154	15.1985
																	71.4	50.3776	25.4143	15.198
																	71.5	50.3765	25.4131	15.1974
																	71.6	50.3755	25.412	15.1969
																	71.7	50.3745	25.4109	15.1964
																	71.8	50.3734	25.4098	15.1959
																	71.9	50.3724	25.4087	15.1954
																	72	50.3714	25.4076	15.1949
																	72.1	50.3703	25.4065	15.1944
																	72.2	50.3693	25.4054	15.1939
																	72.3	50.3683	25.4043	15.1934
																	72.4	50.3673	25.4032	15.1929
																	72.5	50.3663	25.4022	15.1924
																	72.6	50.3653	25.4011	15.1919
																	72.7	50.3643	25.4	15.1914
																	72.8	50.3633	25.3989	15.1909
																	72.9	50.3623	25.3979	15.1904
																	73	50.3613	25.3968	15.1899

## Sheet: Figure 3 
Figure 3B
	-20 (min)	0 (min)	100 (min)	130 (min)	250 (min)	350 (min)
#1	0.90904	0.637601	0.203682	0.0363388	0	0
#2	0.998869	0.879844	0.180745	0.0545951	0	0
#3	1.13944	0.98206	0.876477	0.67197	0	0
#4	0.990848	0.929367	0.905807	0.716205	0.038205	0
#5	1.09447	0.921982	0.885761	0.857376	0.69773	0.040059
Figure 3C
	before	0 min	20 min	40-60 min	100-120 min	160-200 min	240-300 min	340-400 min	480-540 min	720-780 min	24 h
	1.06065	0.925522	0.692122	0.871089	0.757405	0.282088	0.448128	0	0.1151	0.049246	1.26744
	0.959265	0.918722	1.00085	1.02826	0.872865	0.443324	0.30296	0.152237	0.313712	0.369452	1.20886
	1.09447	0.921982	0.947391	0.950016	0.871568	0.776369	0.69773	0.040059	0.441604	0.043385	0.958952
	1.22976	0.964665	0.895834	0.928961	0.970059	1.04363	0.791981	1.05023	0.744078	0.154535	0.5383
	1.13944	0.98206	1.03654	0.962236	0.774224	0	0	0	0.492884	0	0.735924
	0.990848	0.929367	0.880555	0.840129	0.811006	0.378838	0.038205	0	0.239452	0	0.878334
	0.924456	0.984743	0.979434	0.972713	0.85098	0.104352	0.767909	0.502399	0.330633	0	0.926602
	0.944231	0.823334	1.04436	0.892486	0.736832	0.537293	0.508871	0.11228	0.120191	0.961574	0.88071
	1.00581	0.98019	0.999421	0.6429	0.827193	0.523554	0.071907	0.416265	0	0.310496	1.15278
	1.00551	0.978017	0.97661	1.01587	0.831005	0.880238	0.715723	0.633954	0.495528	0.682197	1.09574
	1.14191	0.920864	1.00707	1.00624	0.882125	0.859668	0.600062	0.488461	0.591585	0.245679	0.620678
	0.874117	0.784179	0.44482	0.290805	0.16023	0.214785	0.46971	0.242261	0.509709	0.346808	0.809979
	0.939668	0.825315	0.664394	0.967616	0.493504	0.553978	0.213879	0.404708	0.102345	0.073364	0.593761
	0.962421	1.14238	0.866816	0.992619	0.4953	0.358995	0.098008	0.270853	0.41297	0.200133	1.03863
	1.07051	0.901135	0.994551	0.73024	0.723038	0.309236	0.31184	0.195775	0.123997	0.10754	0.691222
	1.07872	1.16075	0.512214	1.02737	1.02295	0.194489	0.099751	0.49072	0.159856	0.160739	1.05013
	0.839172	1.06864	1.0962	0.927377	0.201805	0.329774	0.195698	0.145205	0.094785	0.177543	0.981763
	0.991921	1.09065	0.882217	0.932328	0.492866	0.561275	0.515431	0.300837	0.542729	0.225808	0.804588
	0.925058	1.00543	1.07315	1.02667	0.974384	0.333185	0.1682	0.307191	0.195551	0.242078	0.63193
	0.900257	0.750521	1.05345	0.767726	0.164438	0.731808	0.428243	0.42552	0.217162	0.408162	0.806816
	1.16384	0.693074	0.961048	1.00254	0.522457	0.484	0.129273	0.235273	0.163626	0.253771	0.410135
	1.04376	1.13055	0.782337	1.1141	0.176477	0.089272	0.105658	0.076092	0.086026	0.101654	0.837843
	0.942697	0.90808	1.01172	0.976667	0.225981	0.58739	0.509851	0.326247	0.393475	0.185254	0.782385
	1.04508	1.0187	0.799807	0.856489	0.9443	0.669805	0.396467	0.103499	0.247784	0.503341	0.344687
	1.03557	0.940832	1.09767	0.995389	0.614168	0.499601	0.56558	0.754149	0.693535	0.729895	0.446141
	0.833182	0.976136	0.976703	0.559569	0.681641	0.140458	0.687937	0.354552	0.104222	0.564252	0.73374
	0.96516	0.935976	0.804356	0.905035	0.417131	0.273497	0.563819	0.26079	0.334237	0.286781	0.376803
	1.30127	1.03884	1.06467	0.980958	0.220789	0.34694	0.395758	0.756251	0.23618	0.176869	0.424646
	0.80558	0.939013	0.946156	1.08974	0.829	0.151735	0.37721	0.265898	0.654212	0.630591	0.409844
	1.11868	0.565735	0.488143	0.99672	0.962862	0.399822	0.312647	1.63398	0.170024	0.187018	0.927469
	0.875928	1.11571	0.655003	1.09417	0.595496	0.567587	0.776327	0.484628	0.272075	0.159531	1.17724
	1.00916	1.04689	0.676764	0.808714	0.40789	0.280292	0.239924		0.495016	0.483772
	0.953884	1.11571	0.694443	1.12216	0.18498	0.505968	0.918161		0.126474	0.932668
	0.947194	1.04311	0.959454	0.981599	0.424581	0.620694	0.047906		0.054938	0.254331
	1.09055	0.989928	0.921476	0.612832	0.671788	0.08927	0.078112		0.33383	0.752396
	1.26358	0.871572	0.765362	0.634216	0.48884	0.478234	0.079403		0.081461	0.60928
	0.961774	0.429441	0.859236	1.10315	0.824562	0.790069	0.672342		0.080565	0.729502
	1.1222	0.681059	0.689081	0.708705	0.129548	0.284825	0.136283		0.119908	0.706821
	0.827554	0.813873	1.03719	0.51095	0.563225	0.252489	0.133534		0.210756	0.691103
	0.973176	0.937247	0.757872	0.533367	0.102135	0.417582	0.0922		0.164344	1.16854
	1.12322	1.01068	0.870885	0.730414	0.363326	0.337989	0.276675		0.191921	0.385115
	0.869153	0.701459	1.01387	0.232879	0.084436	0.266361	0.072784			0.239718
	0.911899	0.839466	0.102879	1.06155	0.250234	0.105065	0.117972			0.095798
	1.09881	1.11367	0.839858	0.477859	1.03375	0.367037	0.233869			0.197055
	0.951022	0.751267	1.21779	0.745414	0.869561	0.108366	0.58522			0.359602
	1.04055	1.05695	0.208299	0.652655	0.08535	0.628578	0.326883
	0.794313	1.15083	1.11275	0.812697	0.289442	0.236987
	1.0916	1.01138	0.79751	0.373261	0.513749	0.486945
	1.03401	0.92799	0.719866	0.916027	0.575386	0.225906
	1.01854	0.901749	0.495495	0.831036	0.318662	0.263754
	0.793382	1.14127	0.481567	0.696876	0.164343	0.21024
	0.997733	0.914553	0.92579	0.099502	0.372875	0.253611
	0.96587	1.04797	0.578926	0.892995	0.108133	0.051113
	1.11378	1.02424	0.676233	0.252436	0.304045	0.346448
	0.852171	1.01772	0.701175	0.524354	0.135038	0.158053
	1.07055	1.08424	0.948436	1.01527	0.339448	0.310735
	1.04226		0.128932	0.128846	0.069492	0.375034
	1.30678		0.65769	0.308368	0.24369	0.586394
	0.853384			1.09809	0.080854	0.142603
	1.12329			0.699197	0.081773	0.107017
	0.96031			1.23965	0.180344	0.320126
	0.97317			0.847581	0.912233	0.169856
				0.469044	0.653778	0.277319
				0.336782	0.176349	0.121991
				0.784127	0.127982	0.255826
				0.936298	0.437217	0.119924
				0.304542	0.457388	0.265431
				0.301997	0.319592	0.115645
				0.382472	0.103661	0.287294
				1.00443	0.325167	0.441732
				1.01022	0.078306
				0.171124	0.950467
				0.479713	0.062932
				0.184023
				0.477291
				0.277549
				0.391381
				0.243921
				0.210469
				0.200135
				1.08674

## Sheet: Figure 4 
Figure 4D		mouse 1	mouse 2	mouse 3	mouse 4		Average
	0 min	4	0	6.06	0		2.515
	20 min	4	0	6.06	0		2.515
	40-60 min	4	0	6.06	0		2.515
	100-120 min	4	0	6.06	0		2.515
	160-200 min	8	0	33.33	5.88		11.8025
	240-300 min	16	0	42.42	29.41		21.9575
	340-400 min	40	12.9	51.52	29.41		33.4575
	480-540 min	56	32.26	54.55	58.82		50.4075
	720-780 min	84	67.74	72.73	82.35		76.705
	24 h	96	90.32	78.79	82.35		86.865

## Sheet: Figure 5 
Figure 5B
	Time (Day)	X			Y			Z
		mouse 1	mouse 2	mouse 3	mouse 1	mouse 2	mouse 3	mouse 1	mouse 2	mouse 3
	1	299.117	569.619	494.087	191.047	124.296	127.808	20.4573	22.0499	33.0226
	1.1	339.432	662.787	445.823	156.359	91.1272	126.883	37.5074	19.0715	25.2669
	1.3	302.617	900.808	444.268	159.563	112.654	159.468	16.2418	29.9843	36.9041
	1.5	344.495	1047.22	432.977	174.951	103.818	193.076	18.2455	36.8415	45.6782
	2	192.72	847.249	276.849	140.143	124.18	182.222	19.2825	40.5577	31.6411
	2.1	178.313	800.454	332.185	135.498	131.934	199.208	27.6331	37.2456	35.7424
	2.3	125.115	712.903	299.751	116.692	153.343	161.928	21.9894	48.2115	29.4098
	2.5	84.9549	517.596	262.65	105.2	131.844	126.226	25.1754	42.8199	28.9838
	3	68.4649	608.914	187.159	86.0803	191.731	138.16	28.879	51.8578	32.5242
	3.5	55.5679	578.569	157.225	67.496	141.483	115.883	18.5516	47.9241	43.4229
	4	54.6056	341.214	190.468	62.6404	131.353	109.801	16.8187	36.4677	41.701
	4.5	27.0087	355.101	155.249	32.0319	150.405	100.285	7.64599	47.2689	32.2531
	5	35.9455	248.914	166.411	28.9967	126.93	84.8863	4.85492	36.3151	30.8589
Figure 5C
	Time (Day)	mouse 1	mouse 2	mouse 3
	1	31	36	37
	1.1	35	40	40
	1.3	35	44	36
	1.5	33	42	39
	2	41	39	42
	2.1	41	39	32
	2.3	43	43	36
	2.5	44	41	40
	3	50	45	42
	3.5	57	49	36
	4	49	52	54
	4.5	54	56	52
	5	61	54	52
Figure 5E
	1	1.1	1.3	1.5	2.0	2.1	2.3	2.5	3	3.5	4	4.5	5
	1.26744	1.0565	0.890745	1.07039	1.19875	1.2269	0.925234	1.07273	1.0213	1.01245	0.991646	1.16971	0.901618
	1.20886	0.747047	1.062	0.965037	0.909797	0.919809	0.981134	0.858081	1.01082	1.16505	0.826189	1.01808	0.996076
	0.958952	1.22642	0.982061	0.953186	0.952481	1.21899	1.16494	0.841363	1.3122	0.919473	1.04452	1.22683	1.16427
	0.5383	0.547491	0.81757	0.99506	1.04401	1.18957	0.93187	1.30532	1.03252	1.14042	1.04597	0.968765	1.05799
	0.735924	1.17881	1.20271	0.967536	0.997379	1.13004	1.0844	1.13091	1.21024	0.985579	0.983574	1.05833	1.10158
	0.878334	0.953883	0.802567	1.05541	1.02865	1.01035	1.314	1.08166	0.788978	0.865141	0.889362	0.86668	0.924728
	0.926602	1.04226	1.05855	1.11304	0.933062	0.966289	1.08272	1.07955	1.10635	0.863501	1.01213	0.979134	1.15525
	0.88071	0.352119	1.2273	1.01457	1.15364	0.949151	1.02329	1.03724	1.16796	0.943175	1.07393	1.11218	0.902409
	1.15278	1.46612	0.812328	1.00009	1.19206	0.945428	1.11691	0.839815	1.01648	1.11324	0.978468	0.902457	0.970076
	1.09574	0.992405	1.01772	1.10276	1.03534	1.14252	0.956415	0.932564	0.998722	1.07672	0.927179	1.18105	0.916632
	0.620678	0.834201	1.03197	0.745233	1.06521	1.10008	1.03632	1.0178	1.03506	0.966395	1.07491	0.941213	0.996846
	0.809979	0.977805	0.814719	1.11267	1.1332	1.20057	0.835679	1.2214	0.992661	1.18847	1.03305	1.08876	1.17361
	0.593761	0.983354	1.06688	0.975025	0.897435	0.966461	0.898929	0.998988	1.17904	1.0476	0.957625	0.828695	1.09886
	1.03863	0.772819	0.959241	0.991884	1.05584	0.938424	1.02949	0.929283	1.09295	0.761536	0.842372	1.18468	0.993635
	0.691222	0.939042	0.798696	0.933831	1.16327	1.02213	1.1163	1.05005	0.358847	1.02211	1.06728	1.18497	0.936409
	1.05013	1.06539	0.734879	0.832492	0.927716	1.13684	0.976151	0.800479	1.33242	1.02211	0.942699	0.865045	1.10654
	0.981763	0.511877	0.93596	0.794282	0.991092	1.295	0.91837	0.94925	0.857817	0.998773	0.963794	1.12139	1.02968
	0.804588	0.952738	1.12139	1.02063	1.00232	1.14964	1.10301	0.95411	1.24196	1.06553	1.10922	1.21976	1.05203
	0.63193	1.03214	1.12808	0.740339	0.744335	1.10718	1.02994	1.08034	0.907009	1.07278	1.00002	1.04584	0.972796
	0.806816	0.96907	0.729406	1.06576	0.945502	1.12067	0.783932	1.13044	0.943799	1.05127	1.05646	1.08486	0.855781
	0.410135	1.12025	0.928229	0.870493	1.07091	0.873522	0.798227	0.935546	1.16292	0.941987	1.18251	1.03319	1.01922
	0.837843	1.08715	0.936063	1.16941	0.995807	1.07146	0.971897	0.889315	0.900796	0.970252	1.06475	1.10502	0.948799
	0.782385	0.714949	0.958064	0.954957	1.0224	0.875409	0.750281	1.23035	0.985748	1.22461	1.12696	1.04688	0.928948
	0.344687	0.935701	1.36549	0.858186	0.98078	0.793297	0.983685	1.03683	1.32224	0.88472	0.718495	0.949626	1.32164
	0.446141	1.05537	0.790625		0.829881	0.967635	1.08427	1.07056	1.04561	1.14756	0.494166	1.14507	0.969201
	0.73374	1.18905	0.869304			1.04663	1.23359	1.11582	1.33689	1.07671	1.22271	1.04066	1.42174
	0.376803	1.24281	0.948843			1.07717	1.37325	0.872161		1.04906	0.695663	1.11689	0.963835
	0.424646					1.02062	1.06699				0.917852	0.963297
	0.409844					1.01542	0.999479				1.08115
	0.927469
	1.17724

## Sheet: Figure 6B-D
Figure 6B
	day 5-6													day 7-8							day 9-11											day 12-14						day 15-17					day 18-21			day 24-27			day 28-31
X	35.9455	40.8567	37.7625	41.3255	248.914	236.874	250.199	195.624	166.411	126.239	144.551	154.13	88.1029	30.2575	22.489	210.673	193.395	159.698	120.954	123.379	8.69009	3.72345	-1.38698	172.592	179.393	164.904	109.255	148.915	131.332	64.1579	84.773	15.9998	154.014	170.952	137.676	111.831	71.7067	117.587	110.899	91.2846	124.616	29.5624	134.788	134.604	30.2901	113.523	100.944	33.965	124.836
Y	28.9967	31.2676	31.7794	38.7243	126.93	120.027	126.982	98.5375	84.8863	73.2764	74.5909	63.2049	59.944	24.5504	16.1023	99.4983	92.9834	62.9407	55.3857	46.5705	5.4581	7.04502	5.32595	80.6283	67.9673	69.6679	45.134	44.5242	39.3467	19.4904	28.4792	-0.99825	63.6078	78.6616	39.9937	52.0221	23.0029	61.807	49.0162	46.0201	55.9515	-0.159137	46.77	48.387	3.31536	40.5843	27.8227	-3.40695	49.9539
Z	4.85492	5.49186	0.152684	10.0384	36.3151	47.8419	43.7768	38.0476	30.8589	21.0625	29.5529	19.1189	30.2638	-3.11331	4.02819	32.4777	29.078	25.3774	15.9268	27.6767	-2.90547	-4.74934	-2.57101	27.0262	22.7506	21.5086	15.6333	19.6971	14.8242	14.7375	28.7508	-0.69734	28.1827	28.1528	25.2893	24.756	26.4143	27.3666	16.4532	19.2532	26.3536	20.1696	24.2861	28.3032	28.8852	22.512	12.641	21.2105	12.394
Figure 6C
	day 5-6	day 7-8	day 9-11	day 12-14	day 15-17	day 18-21	day 24-27	day 28-31
	61	60	58	51	53	50	54	43
	57	56	54	49	51	48	44	52
	53	46	63	49	48	49	49	43
	50	50	47	57	45
	57	58	55	47	52
	47	54	52	46
	49	49	60
			52
			53
			43
			46
Figure 6D
	day 5-6	day 7-8	day 9-11	day 12-14	day 15-17	day 18-21	day 24-27	day 28-31
	1.10894	1.01251	1.25782	1.13152	1.04799	1.06417	1.00817	1.11216
	1.03178	1.09163	0.884444	1.00062	1.06076	0.991682	1.12083	1.32544
	0.97871	1.08979	1.05358	1.02282	0.935092	0.975303	1.03734	1.04041
	1.13757	0.888518	1.27269	0.997743	1.03488	1.15328	1.09424	0.917484
	1.16318	1.07112	0.913456	1.14782	1.02857	1.1009	0.888521	1.07342
	0.926088	1.07479	1.03265	0.966695	0.959387	1.13988	0.964707	1.0393
	1.07147	1.3139	0.923764	1.09079	0.959405	0.674019	1.09246	0.927556
	0.992397	1.0162	1.15029	0.975675	0.777589	1.01536	1.44763	1.1152
	0.977311	0.960125	0.963778	1.03568	0.839865	0.916913	1.00598	0.984697
	1.2992	1.13875	1.08807	1.07091	1.0125	1.05721	1.00743	1.10311
	1.0798	0.93457	1.03139	0.757999	1.01942	0.955282	0.988116	1.07998
	0.91214	1.02354	0.915385	0.904925	0.790242	1.05351	1.03617	0.969254
	1.17908	1.11842	0.752542	0.860249	1.03836	1.04269	1.01793	0.919217
	0.884344	1.10223	0.964542	0.889341	1.06713	0.952407	0.91301	1.03886
	0.840445	1.05222	1.06225	1.03299	1.03746	1.01255	0.996949	1.07013
	1.0423	0.950723	0.94998	1.09336	1.11496	0.897554	1.25285	1.08615
	1.07193	1.13298	0.91145	1.10181	1.0344	1.2163	0.870213	1.07156
	1.14102	0.841557	1.05229	1.02561	0.920869	1.21766	1.18253	0.957123
	1.15918	1.08455	1.04705	1.19082	0.972741	0.881193	0.853397	0.843216
	1.16775	1.12948	0.97033	0.921163	1.03309	0.991024	1.15498	0.795492
	1.17179	1.04528	0.972233	0.938641	1.05839	0.930626	1.15369	0.908071
	0.90636	1.07404	0.908752	1.15667	1.0075	1.0692	0.998991	1.09316
	1.14575	0.786793	1.15289	0.833953	1.15126	1.00868		1.01867
	0.959956	1.00475	1.04341	0.887978	1.05051	0.985994
	1.06255	1.00798	0.92068	0.907627	1.05358	0.950477
	0.947883	0.70395	1.07223	0.813111	1.02972
	1.16945	1.22135	0.997415	0.960219	0.780921
	0.977713	0.970772	0.926754	0.862411	1.02093
	1.03551	1.13837	1.01586	1.12204	0.964727
	1.08992	1.00917	1.17048	1.1023	1.18594
	1.12634	0.872452	0.92294	1.02049	1.04133
	1.20934	1.12088	0.991205	0.946535	0.941638
	0.954828	0.979266	0.849859	0.710815	1.22721
	0.873736	1.07804	1.08967	0.967948	1.11407
	0.927614	1.00548	1.25386	1.0674	1.1324
	1.10449	0.885114	0.967381	1.11387
	0.997212	0.946423	1.01286	0.957707
	0.912294	0.846508	0.988928	0.875123
	1.13178	1.02096	1.05838	0.806592
	0.96997	0.990941	0.662899	0.991645
	1.01321	1.03723	1.19497	1.08656
	0.799071	0.998358	1.00398	1.26336
	1.08597	0.900326	0.794235	0.987733
	1.13332	1.06895	1.00089
	1.00656	0.883332	0.993318
	1.0507	1.13683	1.02626
	1.03151	1.16208	1.01237
	0.891482	0.764203	1.01737
	1.09405	1.14934	1.00053
	1.13205	0.944609	0.94419
	1.38414	0.999938	1.10301
	1.23697	0.889474	0.889359
	1.05326	0.940455	0.895642
		1.17214	0.951019
		1.1282	1.08163
		0.979167	1.07414
			0.880517
			1.07865
			1.07022
			1.04952
			0.956995
			0.946266
			0.916451
			0.958732
			1.12684
			0.963225
			1.07321
			1.13984
			0.927698
			1.13376
			0.60911
			0.694664
			1.22698
			0.955431
			1.01638
			0.975568
			1.05006
			0.808355
			1.18218
			0.920103
			0.841685
			1.01924
			0.926696
[truncated: 2 more columns]

## Sheet: Figure 6F-H
Figure 6F
	day 32-35			day 36-39			day 40-43			day 44-47			day 48-51			day 52-55			day 57-60				day 64-67
X	75.5231	55.4872	18.5582	66.9661	59.18	31.5258	107.693	54.9546	18.7304	74.0445	80.4348	21.9498	73.1403	89.5572	47.5864	57.3557	53.6489	17.4269	43.4097	57.75	0.624799	9.64832	32.7606	25.4191	78.1629	65.6734	10.177
Y	38.6882	29.294	7.55485	25.3271	32.3528	18.5203	36.5681	34.1344	6.3613	17.0411	30.7274	2.92953	32.6754	46.0273	18.7811	30.2242	41.3995	9.03298	20.1522	29.4737	3.09167	14.5617	15.7324	10.7532	45.1272	31.8396	-1.04051
Z	12.6146	24.1839	17.5678	18.4637	26.8417	22.6453	21.2646	23.0547	21.2114	12.0085	18.2587	12.5358	25.0305	25.3967	21.3962	15.5444	15.8295	15.6885	17.147	16.5073	7.67114	19.9102	12.2529	5.26526	18.2002	15.4003	17.3834
Figure 6G	day 32-35	day 36-39	day 40-43	day 44-47	day 48-51	day 52-55	day 57-60	day 64-67
	44	44	43	42	41	42	41	43
	48	51	45	49	55	45	43	44
	44	44	39	45	46	46	46	41
							47	50
								49
Figure 6H	day 32-35	day 36-39	day 40-43	day 44-47	day 48-51	day 52-55	day 57-60	day 64-67
	1.11994	1.12078	1.1311	1.28556	0.957392	1.18925	1.15762	1.32751
	1.04337	1.01974	0.913076	1.20602	1.03725	1.01867	0.942379	0.874108
	1.17636	0.993751	1.05192	1.16823	0.887617	1.02118	0.524381	0.999268
	0.995459	1.08565	0.986823	0.984904	1.09727	1.2476	1.10614	1.01537
	1.03709	0.8969	1.02904	0.950306	0.896782	0.982022	0.930888	0.9831
	1.0069	1.03189	1.08441	0.889626	1.11742	1.03734	1.09397	1.26654
	1.20728	1.10316	1.0589	1.12039	1.01703	1.03712	0.85606	0.988397
	1.0671	0.99435	0.895692	0.917869	0.927772	1.07729	1.02793	0.914186
	0.929577	0.843891	0.871683	1.02193	0.884602	1.02353	0.891483	0.862771
	0.96819	0.928313	1.03188	0.904426	1.16695	1.0347	0.947471	1.00205
	0.994683	0.9728	0.861235	0.934375	1.04332	1.02664	0.966705	1.18233
	0.859415	0.975501	0.934878	0.887299	1.07668	0.999055	1.00899	1.05731
	0.933066	0.91027	1.10474	0.885108	1.12995	0.964638	0.961108	0.996155
	1.04897	0.975533	0.948922	0.866456	0.890767	1.12873	1.11237	0.840199
	1.08549	0.939127	1.19654	1.11627	0.992721	1.05443	0.876173	1.09139
	1.07302	1.00623	0.993768	0.896708	0.981737	1.05211	1.13346	0.874427
	0.949138	0.967923	1.03253	1.01192	0.967362	1.07961	1.00615	0.900013
	0.783478	1.07844	1.07654	0.950137	0.932915	1.17242	0.951004	1.11061
	0.952381		1.00477	0.844241	0.893352		1.23759	1.03211
	1.05505		1.0919	1.05869	0.948191		1.08198	1.13098
	0.752336		0.825502	1.04877	1.04815		1.00893	1.04342
	0.959795		0.771157	0.886862	0.896851		1.26317	0.987946
					1.05789		0.983344	0.878458
							1.37276	0.939013
							0.852947	1.05375
							1.07416	1.04038
							1.25914	0.964591
							0.980749	0.991666
								1.11369
								0.914922
								0.852255
								1.02182
								0.930474
								1.00764

## Sheet: Supplementary figure 1
Supplementary figure 1B
	day 7-8						day 9-10						day 11-12						day 14-16						day 19-21						day 23-25						day 33-36
	320	284	331	238	204		774	311	491	119	440		424	239	1016	549	1099		560	649	535	753	1294		1266	1340	927	1437	2231		1823	1592	2326	1776	2335		2432	2032	2921	1551	2335
	534	234	239	107	228		841	368	466	168	444		298	452	838	802	1170		407	404	501	945	900		1251	673	866	1813	2027		1394	1543	2109	2092	2342		1730	2180	1662	1980	2051
	346	284	521	190	164		773	569	634	311	334		495	539	751	569	849		788	461	617	1132	857		1055	759	1066	1994	1830		1345	1639	2511	2058	2188		2220	1996	1660	2400	1492
	540	335	415	218	219		647	703	686	133	396		238	568	497	982	1124		480	416	442	1139	1115		725	786	1281	1924	1261		2624	1761	1710	1895	1993		1552	2318	2858	2604	1347
	218	278	276	205	233		543	786	692	175	408		249	357	525	1029	1110		417	420	521	1436	1172		721	884	598	2256	1486		1470	1524	1830	2067	1949		2032	1948	1578	1401	2153
	208	290	599	123	246		586	495	911	164	435		415	350	457	1518	900		540	448	959	1349	909		773	710	787	1639	1969		2191	1827	1557	2446	1757		2346	1906	1667	1827	1524
	222	257	290	127	131		750	450	619	281	336		423	462	586	904	1216		583	794	984	1252	1200		1555	658	734	1704	2354		1919	1611	1742	2523	1933		1519	1924	1375	1557	2026
	226	280	497	138	123		893	529	611	149	431		271	442	868	1432	979		449	1057	1242	1113	1339		1583	901	877	2552	1954		1384	1868	1826	1699	2263		2368	2066	1387	1453	1546
	318	482	400	210	179		908	356	933	188	407		268	342	682	1124	903		415	888	625	1131	1311		1259	748	784	2064	1346		1757	1488	1354	1662	2209		2651	1961	1427	1486	1604
	324	308	263	169	157		742	453	436	215	421		260	577	657	1198	954		417	965	791	891	1211		698	749	883	1665	1526		1654	2311	1617	1943	1868		2486	2558	1388	1610	1994
	315	489	335	114	148		806	426	475	232	329		291	303	639	1162	1318		478	1316	1018	896	1201		651	982	838	1191	1909		1671	1749	1449	2001	1961		1915	2420	1665	2293	1716
		day 7-8	day 9-10	day 11-12	day 14-16	day 19-21	day 23-25	day 33-36
	Average	275.073	494.164	703.091	838.782	1281.82	1875.2	1929.05
	SEM	16.1629	30.2676	47.1925	44.0242	72.7717	43.5548	56.0288
Supplementary figure 1C
	day 7-8	day 9-10	day 11-12	day 14-16	day 19-21	day 23-25	day 33-36
	12.2965	13.7812	16.8732	17.158	17.3665	16.0262	11.97
	15.306	16.9899	14.719	19.7378	16.6173	18.8407	19.6489
	3.33247	4.6694	5.10417	9.74685	8.8564	10.3059	9.1062
	3.969	4.53015	4.7797	7.98445	10.156	8.14213	7.61
				5.7104	6.55553	4.2628	4.24
				3.6821	4.6854	4.5	3.84
		day 7-8	day 9-10	day 11-12	day 14-16	day 19-21	day 23-25	day 33-36
	Average	8.72598	9.99266	10.369	10.6699	10.7062	10.3463	9.40252
	SEM	2.99672	3.18186	3.16473	2.61924	2.1331	2.45264	2.39774

## Sheet: Supplementary figure 2
Supplementary figure 2B
	Time (min)	Diameter (μm)
	0	12
	2	9
	3	9
	5	20
	6	25
	7	25
	8	27
	9	28
	10	25
	12	21
	13	23
	14	21
Supplementary figure 2C
	Time (min)	Velocity (mm/s)
	0	4.25
	2	3.34
	3	3.36
	5	4.59
	6	4
	7	2.62
	8	2.91
	9	2.44
	10	0
	12	0
	13	0
	14	0

## Sheet: Supplementary figure 4
Supplementary figure 4C
	Time (Day)	vessel-1	vessel-2
	-0.0166667	10.2154	8.688
	0	0	0
	0.0125	0	0
	0.0256944	0	0
	0.0430556	0	0
	0.0666667	0	0
	0.0875	0	0
	0.125	0	0
	0.166667	0	0
	0.25	0	0
	0.333333	0	0
	0.5	0	0
	0.916667	0	0
	1.125	0	0
	1.39583	0	0
	1.58333	6.3506	4.5513
	1.95833	5.8795	4.4412
	2.08333	6.3474	5.1832
	2.33333	5.8403	5.4546
	2.58333	7.1034	6.244
	2.97917	5.4734	6.1976
	3.375	4.9352	7.3689
	3.95833	8.205	8.2755
	4.41667	5.4777	8.4058
	5	4.8155	8.4116
	5.45833	5.7076	8.2429
	5.97917	3.6578	7.8211
	6.5	6.5366	11.8226
	7	7.4842	10.9224
	8	7.2975	12.3908
	9	5.8631	10.3512
	10	4.4747	8.8563
	11	3.1119	8.4026
	12	3.9197	9.5225
	14	3.6402	9.2352
	16	3.7113	12.4027
	17	5.47855	6.0878
	19	5.6483	8.0585
	24	5.7633	8.205
	28	5.4978	6.2467
	32	2.5653	4.1075
	36	4.6432	4.8647
	40	5.9695	6.8113
	44	4.5871	3.4677
	48	5.8994	4.1242
	52	11.4527	8.8154
	56	11.7616	6.7086
	60	10.1721	8.1506
	64	5.8031	7.3832
	66	9.6353	6.0611
	73	10.4674	6.0355

## Sheet: Supplementary figure 5
Supplementary figure 5B
	before	1.06065	0.959265	1.09447	1.22976	1.13944	0.990848	0.924456	0.944231	1.00581	1.00551	1.14191	0.874117	0.939668	0.962421	1.07051	1.07872	0.839172	0.991921	0.925058	0.900257	1.16384	1.04376	0.942697	1.04508	1.03557	0.833182	0.96516	1.30127	0.80558	1.11868	0.875928	1.00916	0.953884	0.947194	1.09055	1.26358	0.961774	1.1222	0.827554	0.973176	1.12322	0.869153	0.911899	1.09881	0.951022	1.04055	0.794313	1.0916
	0min	0.925522	0.918722	0.921982	0.964665	0.98206	0.929367	0.984743	0.823334	0.98019	0.978017	0.920864	0.784179	0.825315	1.14238	0.901135	1.16075	1.06864	1.09065	1.00543	0.750521	0.693074	1.13055	0.90808	1.0187	0.940832	0.976136	0.935976	1.03884	0.939013	0.565735	1.11571	1.04689	1.11571	1.04311	0.989928	0.871572	0.429441	0.681059	0.813873	0.937247	1.01068	0.701459	0.839466	1.11367	0.751267	1.05695	1.15083	1.01138
	20min	0.692122	1.00085	0.947391	0.895834	1.03654	0.880555	0.979434	1.04436	0.999421	0.97661	1.00707	0.44482	0.664394	0.866816	0.994551	0.512214	1.0962	0.882217	1.07315	1.05345	0.961048	0.782337	1.01172	0.799807	1.09767	0.976703	0.804356	1.06467	0.946156	0.488143	0.655003	0.676764	0.694443	0.959454	0.921476	0.765362	0.859236	0.689081	1.03719	0.757872	0.870885	1.01387	0.102879	0.839858	1.21779	0.208299	1.11275	0.79751
	40-60min	0.871089	1.02826	0.950016	0.928961	0.962236	0.840129	0.972713	0.892486	0.6429	1.01587	1.00624	0.290805	0.967616	0.992619	0.73024	1.02737	0.927377	0.932328	1.02667	0.767726	1.00254	1.1141	0.976667	0.856489	0.995389	0.559569	0.905035	0.980958	1.08974	0.99672	1.09417	0.808714	1.12216	0.981599	0.612832	0.634216	1.10315	0.708705	0.51095	0.533367	0.730414	0.232879	1.06155	0.477859	0.745414	0.652655	0.812697	0.373261
	100-120min	0.757405	0.872865	0.871568	0.970059	0.774224	0.811006	0.85098	0.736832	0.827193	0.831005	0.882125	0.16023	0.493504	0.4953	0.723038	1.02295	0.201805	0.492866	0.974384	0.164438	0.522457	0.176477	0.225981	0.9443	0.614168	0.681641	0.417131	0.220789	0.829	0.962862	0.595496	0.40789	0.18498	0.424581	0.671788	0.48884	0.824562	0.129548	0.563225	0.102135	0.363326	0.084436	0.250234	1.03375	0.869561	0.08535	0.289442	0.513749
	160-200min	0.282088	0.443324	0.776369	1.04363	0	0.378838	0.104352	0.537293	0.523554	0.880238	0.859668	0.214785	0.553978	0.358995	0.309236	0.194489	0.329774	0.561275	0.333185	0.731808	0.484	0.089272	0.58739	0.669805	0.499601	0.140458	0.273497	0.34694	0.151735	0.399822	0.567587	0.280292	0.505968	0.620694	0.08927	0.478234	0.790069	0.284825	0.252489	0.417582	0.337989	0.266361	0.105065	0.367037	0.108366	0.628578	0.236987	0.486945
	240-300min	0.448128	0.30296	0.69773	0.791981	0	0.038205	0.767909	0.508871	0.071907	0.715723	0.600062	0.46971	0.213879	0.098008	0.31184	0.099751	0.195698	0.515431	0.1682	0.428243	0.129273	0.105658	0.509851	0.396467	0.56558	0.687937	0.563819	0.395758	0.37721	0.312647	0.776327	0.239924	0.918161	0.047906	0.078112	0.079403	0.672342	0.136283	0.133534	0.0922	0.276675	0.072784	0.117972	0.233869	0.58522	0.326883
	340-400min	0	0.152237	0.040059	1.05023	0	0	0.502399	0.11228	0.416265	0.633954	0.488461	0.242261	0.404708	0.270853	0.195775	0.49072	0.145205	0.300837	0.307191	0.42552	0.235273	0.076092	0.326247	0.103499	0.754149	0.354552	0.26079	0.756251	0.265898	1.63398	0.484628
	480-540min	0.1151	0.313712	0.441604	0.744078	0.492884	0.239452	0.330633	0.120191	0	0.495528	0.591585	0.509709	0.102345	0.41297	0.123997	0.159856	0.094785	0.542729	0.195551	0.217162	0.163626	0.086026	0.393475	0.247784	0.693535	0.104222	0.334237	0.23618	0.654212	0.170024	0.272075	0.495016	0.126474	0.054938	0.33383	0.081461	0.080565	0.119908	0.210756	0.164344	0.191921
	720-780min	0.049246	0.369452	0.043385	0.154535	0	0	0	0.961574	0.310496	0.682197	0.245679	0.346808	0.073364	0.200133	0.10754	0.160739	0.177543	0.225808	0.242078	0.408162	0.253771	0.101654	0.185254	0.503341	0.729895	0.564252	0.286781	0.176869	0.630591	0.187018	0.159531	0.483772	0.932668	0.254331	0.752396	0.60928	0.729502	0.706821	0.691103	1.16854	0.385115	0.239718	0.095798	0.197055	0.359602
Supplementary figure 5C
		X							Y							Z
	before	-34.5411	14.8875		-2.08894		2.28251		-22.3326	21.7252		4.26558		19.8821		-12.3639	11.6338		8.17428		24.2087
	0	-21.398	22.1987		-15.4232		-0.163418		-7.38393	32.2024		15.3972		-3.47598		-14.4461	19.765		10.7066		12.5884
	20min	0.061844	61.6386		13.5823		43.5767		12.0792	20.4037		35.637		-1.19248		-3.7837	14.1132		5.8441		13.2838
	40-60min	28.5342	88.0096	106.205	22.277	37.836	54.6589	62.1457	44.5652	33.0188	38.1622	49.8509	66.6444	-6.56872	-5.53795	14.2384	14.8933	15.8597	5.10144	5.82484	5.56959	13.1913
	100-120min	125.354	181.498		89.0702	163.119	79.1015	85.9273	53.4351	37.7578		65.6797	72.8783	-5.17352	-4.77352	0.236408	13.7456		0.493499	2.54974	10.4685	8.95786
	160-200min	239.842	269.788	354.553	193.421		73.828		79.2516	41.3469	38.9303	58.913		-12.0209		-9.3009	14.2564	5.77656	-8.25716		4.61461
	240-300min	219.784	358.467		209.023		111.417		44.5874	43.2575		69.2554		-2.48085		-21.5498	7.27997		-3.26669		1.77709
	340-400min	337.463	279.743		245.802				70.6138	35.485		137.875				-9.49968	2.37145		19.494
	480-540min	504.226	333.728		334.653		184.885		166.339	71.9085		119.265		13.8957		11.4371	13.1414		13.1252		6.7235
	720-780min	451.195	441.471		333.008		339.227		211.67	113.909		126.295		77.3041		15.5537	35.6878		-0.695603		28.1106
	24h	299.117	569.619		494.087		300.757		191.047	124.296		127.808		84.9904		20.4573	22.0499		33.0226		28.2804
[truncated: 33 more columns]
